# Supplementary material for: Key role of entropy in nanoparticle dispersion: polystyrene-nanoparticle/linear-polystyrene nanocomposites as a model system
Source: Royal Society of Chemistry journal article supplement (doi:10.1039/b714107f), 2007-12-10
Supplement: b714107f.pdf [file b714107f.pdf]

## Supplementary Data

### Key Role of Entropy in Nanoparticle Dispersion: Polystyrene-nanoparticle / Linear-polystyrene Nanocomposites as A Model System

*José A. Pomposo\**, *Alaitz Ruiz de Luzuriaga*, *Agustín Etxeberria* and *Javier Rodríguez*

#### Entropy Changes upon Mixing

We are interested in estimating the entropy change experienced by the pure components (polystyrene-nanoparticles and linear-polystyrene chains) upon mixing. By using a simple hard sphere fluid model (S1-S3), the entropy change for component 1 (polymer-nanoparticles),  $(S_m^{(1)} - S_1)$ , is given by

$$\nu_1(S_m^{(1)} - S_1)/Vk_B = -\phi_1 \left( \ln \phi_1 + \frac{4\phi_1 - 3\phi_1^2}{(1-\phi_1)^2} - 1 \right) - \phi_1 (\nu_1 s_1^{HS} / V_1 k_B) \quad (E1)$$

where  $\nu_1$  is the nanoparticle volume,  $V$  is the total system volume,  $k_B$  is Boltzmann constant,  $\phi_1$  is the volume fraction of nanoparticles in the mixture and  $s_1^{HS} / V_1$  is the reference entropy for the pure fluid (per unit volume)

$$\nu_1 s_1^{HS} / V_1 k_B = -\phi_f \left( \ln \phi_f + \frac{4\phi_f - 3\phi_f^2}{(1-\phi_f)^2} - 1 \right) \quad (E2)$$

Note that the reference entropy corresponds to that of the fluid at maximum packaging volume fraction without freezing (S2, S3),  $\phi_f = 0.494$ , since we are dealing with the components in the disordered, molten state.

Concerning the linear-polymer chains, by taking into account the translational entropy and the stretching entropy changes one can write

$$\nu_1(S_m^{(2)} - S_2)/Vk_B = -t\phi_2 \left( \ln \phi_2 + \frac{3}{2} \left[ \frac{R_g^2}{R_{g0}^2} - 1 \right] \right) \quad (E3)$$

where  $t = \frac{V_1}{V_2}$  and  $\nu_2$  is the polymer chain volume,  $\phi_2$  is the volume fraction of polymer chains in the mixture,  $R_{g0}^2$  is the mean squared gyration radius of the chains in the pure

component and  $R_g^2$  is the mean squared gyration radius of the chains in the mixture.

According to recent neutron scattering experimental data (S4), for cross-linked polystyrene-nanoparticles dispersed in a linear-polystyrene matrix equation E3 becomes

$$v_1(S_m^{(2)} - S_2)/Vk_B \approx -t\phi_2 \left( \ln \phi_2 + \frac{3}{2} \left[ (1 + \phi_1)^2 - 1 \right] \right) \quad (\text{E4})$$

Then, the neat change in entropy upon mixing polymer-nanoparticles and chemically similar linear-polymer chains,  $S$ , is then simply obtained as  $S = (S_m^{(1)} - S_1) + (S_m^{(2)} - S_2)$ .

### Thermodynamic Parameters and Miscibility Boundary Predictions

Based on equation E1-E4 and assuming athermal mixing, the free energy of mixing,  $F$ , is just obtained from  $F = -TS$ . It is well known that for a binary blend to be thermodynamically stable against phase separation the following conditions must be fulfilled simultaneously:  $F < 0$  and  $F^{(2)} > 0$ , being  $F^{(2)} = \frac{\partial^2 F}{\partial \phi_1^2}$  the second derivative of the

free energy of mixing with composition (S5).  $F^{(2)}$  is related to quantities that can be obtained from Small Angle Neutron Scattering (SANS) experiments (such as the Flory interaction parameter,  $\chi$ ). Additionally, the condition  $F^{(2)} = 0$  just determines the spinodal miscibility boundary.

In terms of the present model,  $F^{(2)}$  is given by

$$v_1 F^{(2)} / Vk_B T = \frac{1}{\phi_1} + \frac{t}{\phi_2} - 2 \left( \frac{3}{2} t (1 + 3\phi_1) - \frac{4 - \phi_1}{(1 - \phi_1)^4} \right) \quad (\text{E5})$$

To be consistent with SANS analysis procedures for binary polymer blends (S4), where the common reference volume is that of the polymer repeat unit denoted as  $v_0$ , we rewrite equation E5 as

$$v_0 F^{(2)} / Vk_B T = \frac{1}{r\phi_1} + \frac{1}{N\phi_2} - 2 \left( \frac{3}{2} \frac{(1 + 3\phi_1)}{N} - \frac{4 - \phi_1}{r(1 - \phi_1)^4} \right) \quad (\text{E6})$$

being  $r = \frac{v_1}{v_0}$  and  $N = \frac{v_2}{v_0}$ . By comparison of E6 with the standard treatment of binary

polymer blend miscibility in terms of the Flory-Huggins theory (S5) we have

$$\chi \equiv \left( \frac{3(1+3\phi_1)}{2N} - \frac{4-\phi_1}{r(1-\phi_1)^4} \right) \quad (\text{E7})$$

We have employed equation E7 to estimate the Flory  $\chi$  interaction parameter for 211-kD tightly cross-linked polystyrene-nanoparticles (2 wt %, nanoparticle radius  $\sim 4$  nm) dissolved in 473-kD linear-polystyrene (radius of gyration  $\sim 18$  nm,  $N = 4550$ ) (S4). The calculated value,  $\chi_{cal} = -2.3 \times 10^{-3}$  is in very good agreement with that obtained from neutron scattering data ( $\bar{\chi}_{exp} = -2 \times 10^{-3} \pm 1 \times 10^{-3}$ ) (S4).

Finally, the spinodal miscibility boundary is determined from

$$\frac{1}{r\phi_1} + \frac{1}{N\phi_2} - 2 \left( \frac{3(1+3\phi_1)}{2N} - \frac{4-\phi_1}{r(1-\phi_1)^4} \right) = 0 \quad (\text{E8})$$

For a given blend composition, equation E8 allows one to *predict* the miscibility boundary for cross-linked polystyrene-nanoparticles dissolved in a linear-polystyrene matrix as a function of nanoparticle radius,  $a$  ( $a \propto r^{1/3}$ ) and polymer radius of gyration,  $R_g$  ( $R_g \propto N^{1/2}$ ).

### Supplementary References

- S1. N. F. Carnahan, K. E. Starling, *J. Chem. Phys.* **51**, 635 (1969).
- S2. V. B. Warshavsky, X. Song, *Phys. Review* **69**, 061113 (2004).
- S3. R. P. A. Dullens et al., *Proc. Natl. Acad. Sci. U.S.A.* **103**, 529 (2006).
- S4. M. E. Mackay et al., *Science* **311**, 1740 (2006).
- S5. P.-G. de Gennes, *Scaling Concepts in Polymer Physics* (Cornell University Press, Ithaca, NY, 1985). Chap. 4.
